# Supplementary material for: Getting new algorithmic results by extending distance-hereditary graphs via split composition
Source: PeerJ journal article supplement (doi:10.7717/peerj-cs.627), 2021-07-07
Supplement: code.pdf [file code.pdf]

---

**Algorithm 1:** function  $Z(T, B)$ ,  $T = T(G)$ , for  $G \in \text{sDH}(2)$ 

---

**Input:**  $T(G)$  is assumed rooted,  $B$  is a component of  $T(G)$ **Output:** the pair  $[\zeta(B), \zeta_{\bar{B}}(m)]$ 

- 1 Let  $\{B_1, B_2, \dots, B_k\}$  the children of  $B$  connected to  $B$  by edges  $(m_i, m'_i)$ ,  
 $i = 1, \dots, k$ , where  $m_i \in B$
  - 2 Let  $m$  the marked vertex connecting  $B$  to its parent in  $T$ , if it exists.
  - 3 Let  $a = b = c = d = e = f = \langle 0, 0 \rangle$
  - 4  $a = \max\{\zeta(u, v) \mid (u, v) \text{ is a stretch-pair of } B\}$
  - 5  $b = \max\{\text{first}(Z(T, B_i)) \mid i = 1, \dots, k\}$
  - 6  $c = \max\{\zeta_B(m_i) + \text{second}(Z(T, B_i)) \mid i = 1, \dots, k\}$
  - 7  $d = \max\{\zeta(m_i, m_j) + \text{second}(Z(T, B_i)) +$   
 $\text{second}(Z(T, B_j)) \mid (m_i, m_j) \text{ is a stretch-pair of } B\}$
  - 8 **if**  $m$  *exists* **then**
  - 9      $e = \zeta_B(m)$
  - 10     $f = \max\{\zeta(m, m_i) + \text{second}(Z(T, B_i)) \mid (m, m_i) \text{ is a stretch-pair of } B\}$
  - 11 **return**  $[\max\{a, b, c, d\}, \max\{e, f\}]$
- 

---

**Algorithm 2:** computing  $s(G)$ 

---

**Input:** a graph  $G$  with any component  $B$  of  $\mathcal{D}(G)$  such that  $s(B) < 2$ **Output:**  $s(G)$ 

- 1 compute  $\mathcal{D}(G)$  and  $T(G)$
  - 2 choose a component  $B$  of  $\mathcal{D}(G)$  as a root of  $T(G)$
  - 3 return  $\sigma(\text{first}(Z(T(G), B)))$
-
